# Supplementary material for: Synthesis of tailored oxymethylene ether (OME) fuels via transacetalization reactions
Source: Royal Society of Chemistry journal article supplement (doi:10.1039/d1se00631b), 2021-01-01
Supplement: d1se00631b1.pdf [file d1se00631b1.pdf]

## Electronic Supplementary Information

### Synthesis of tailored oxymethylene ether (OME) fuels via transacetalization reactions

Marius Drexler<sup>a</sup>, Philipp Haltenort<sup>a</sup>, Thomas A. Zevaco<sup>a</sup>, Ulrich Arnold<sup>\*a</sup>, Jörg Sauer<sup>a</sup>

<sup>a</sup> Karlsruhe Institute of Technology (KIT), Institute of Catalysis Research and Technology (IKFT), Hermann-von-Helmholtz-Platz 1, 76344 Eggenstein-Leopoldshafen, Germany. E-mail: ulrich.arnold@kit.edu

#### Content:

|          |                                                                                                                                                                                                         |
|----------|---------------------------------------------------------------------------------------------------------------------------------------------------------------------------------------------------------|
| Page 2:  | A Reaction monitoring                                                                                                                                                                                   |
|          | A.1 Transacetalization reaction of D(2-EH)M with DEM                                                                                                                                                    |
|          | A.2 Transacetalization reaction of D(2-EH)M with DPM                                                                                                                                                    |
| Page 3:  | B NMR spectra                                                                                                                                                                                           |
|          | B.1 NMR spectra for DEM                                                                                                                                                                                 |
|          | B.2 NMR spectra for DPM                                                                                                                                                                                 |
|          | B.3 NMR spectra for DBM                                                                                                                                                                                 |
|          | B.4 NMR spectra for D(2-EH)M                                                                                                                                                                            |
|          | B.5 NMR spectra for (2-EH)EM                                                                                                                                                                            |
|          | B.6 NMR spectra for (2-EH)PM                                                                                                                                                                            |
|          | B.7 NMR spectra for (2-EH)BM                                                                                                                                                                            |
| Page 14: | C FTIR spectra                                                                                                                                                                                          |
|          | C.1 FTIR spectrum of DEM                                                                                                                                                                                |
|          | C.2 FTIR spectrum of DPM                                                                                                                                                                                |
|          | C.3 FTIR spectrum of DBM                                                                                                                                                                                |
|          | C.4 FTIR spectrum of D(2-EH)M                                                                                                                                                                           |
|          | C.5 FTIR spectrum of (2-EH)EM                                                                                                                                                                           |
|          | C.6 FTIR spectrum of (2-EH)PM                                                                                                                                                                           |
|          | C.7 FTIR spectrum of (2-EH)BM                                                                                                                                                                           |
|          | C.8 Comparison of the FTIR spectra of D(2-EH)M and (2-EH)EM                                                                                                                                             |
|          | C.9 Comparison of the FTIR spectra of DEM and (2-EH)EM                                                                                                                                                  |
| Page 17: | D Mass spectra                                                                                                                                                                                          |
|          | D.1 Mass spectrum of (2-EH)EM and relevant fragments                                                                                                                                                    |
|          | D.2 Mass spectrum of (2-EH)PM and relevant fragments                                                                                                                                                    |
| Page 18: | E Tables                                                                                                                                                                                                |
|          | E.1 Molecular structure, CAS number, chemical formula, molar mass and oxygen content of OMDMEs and n-alkanes                                                                                            |
|          | E.2 Physico-chemical properties of OMDMEs and n-alkanes                                                                                                                                                 |
|          | E.3 Fuel properties of OMDMEs and n-alkanes                                                                                                                                                             |
|          | E.4 Thermodynamic properties of OMDMEs and n-alkanes                                                                                                                                                    |
|          | E.5 Joback groups for the description of the investigated OMDAEs (all employed groups exhibit a non-ring structure)                                                                                     |
|          | E.6 Joback parameters for the estimation of boiling point ( $T_b$ ) and the dynamic viscosities ( $\eta_a$ and $\eta_b$ ) of the investigated OMDAEs (all employed groups exhibit a non-ring structure) |
|          | E.7 Data set used for fitting the regression function coefficients (part 1)                                                                                                                             |
|          | E.8 Data set used for fitting the regression function coefficients (part 2)                                                                                                                             |
| Page 21: | References                                                                                                                                                                                              |

## A. Reaction monitoring:

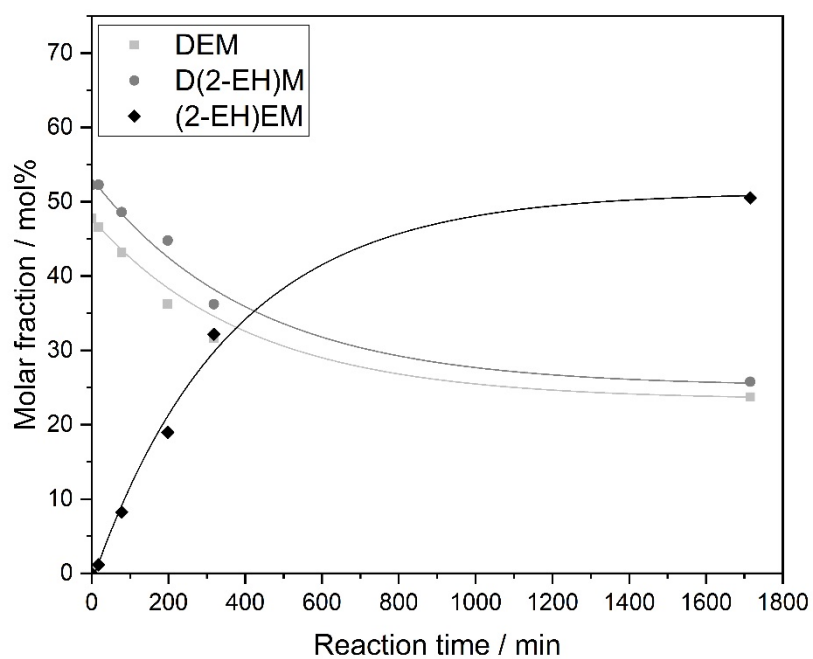

Figure A.1: Transacetalization reaction of D(2-EH)M with DEM catalyzed by zeolite BEA-25 (reaction conditions: 60 °C, 400 rpm, 0.78 wt% catalyst).

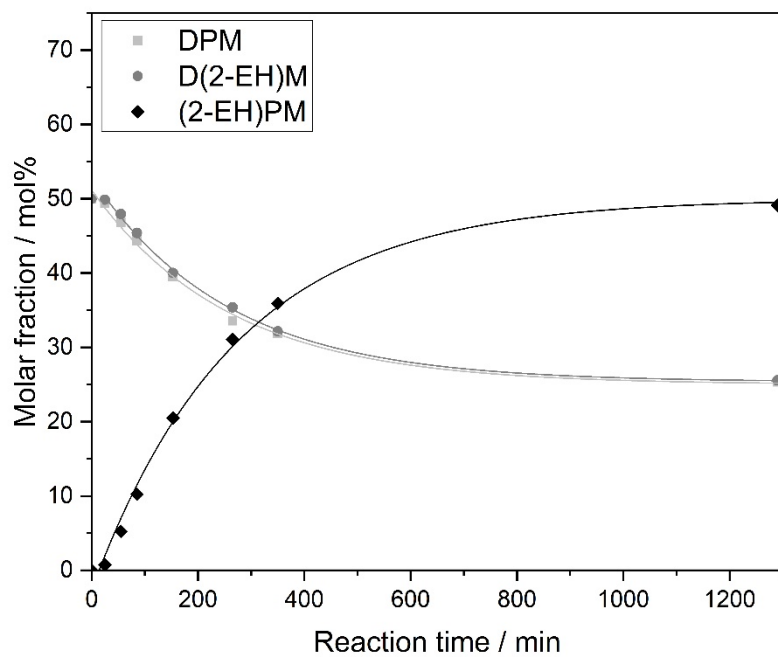

Figure A.2: Transacetalization reaction of D(2-EH)M with DPM catalysed by zeolite BEA-25 (reaction conditions: 80 °C, 400 rpm, 0.78 wt% catalyst).

## B. NMR spectra

### B.1 NMR spectra for DEM:

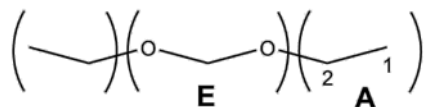

Figure B.1.1: Nomenclature for NMR analysis of DEM.

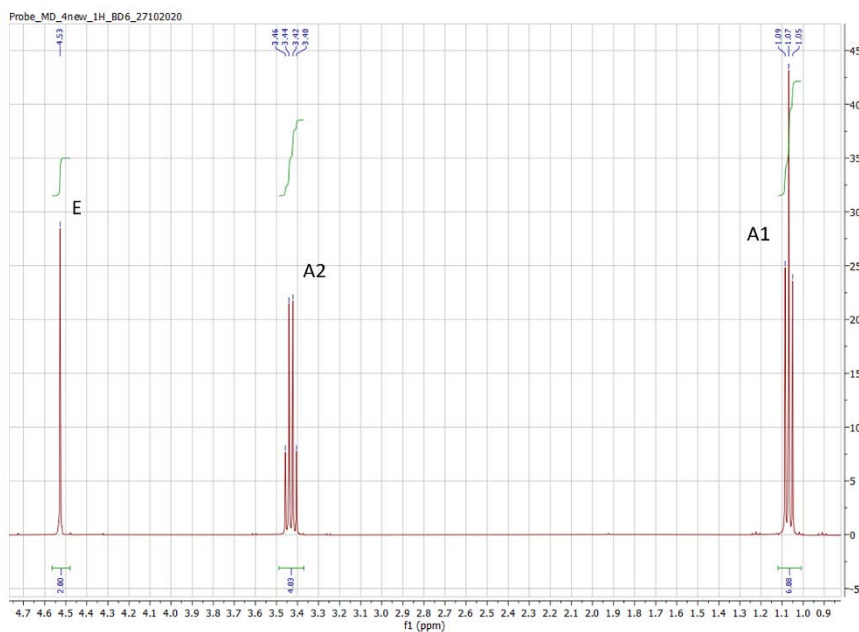

Figure B.1.2: <sup>1</sup>H-NMR spectrum for DEM ( $\delta$  in ppm, J in Hz, in C<sub>6</sub>D<sub>6</sub>): 4.55 (s, 2H, E); 3.44 (q, 4H, A2, <sup>3</sup>J<sub>H-H</sub> 8 Hz); 0.87 (t, 6H, A1, <sup>3</sup>J<sub>H-H</sub> ~8 Hz).

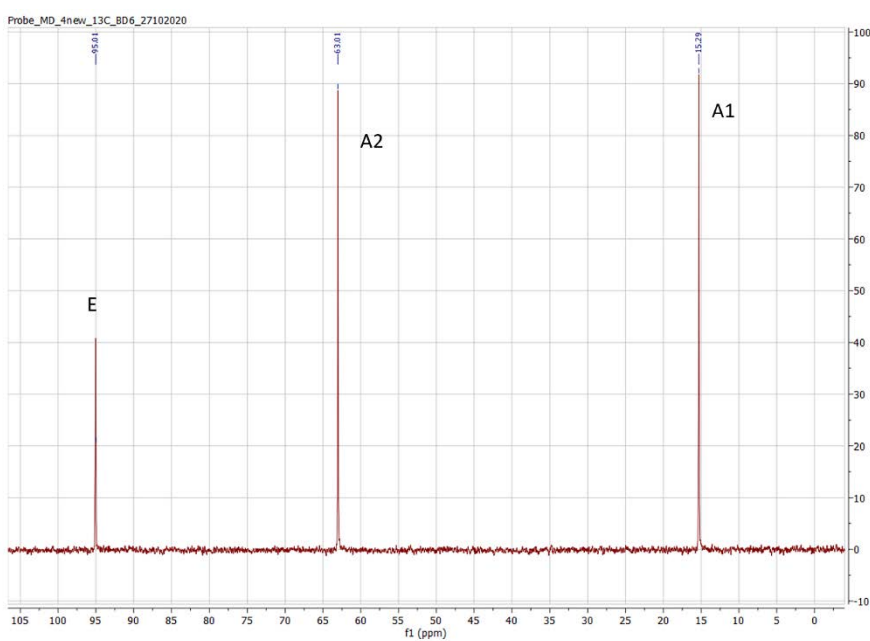

Figure B.1.3: <sup>13</sup>C-NMR spectrum for DEM ( $\delta$  in ppm, J in Hz, in C<sub>6</sub>D<sub>6</sub>): 95.05 ppm (E, <sup>1</sup>J<sub>C-H</sub>= 161.0); 69.03 (A2, <sup>1</sup>J<sub>C-H</sub>= 141.0); 15.34 (A1, <sup>1</sup>J<sub>C-H</sub>= 126).

## B.2 NMR spectra for DPM:

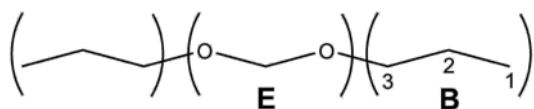

Figure B.2.1: Nomenclature for NMR analysis of DPM.

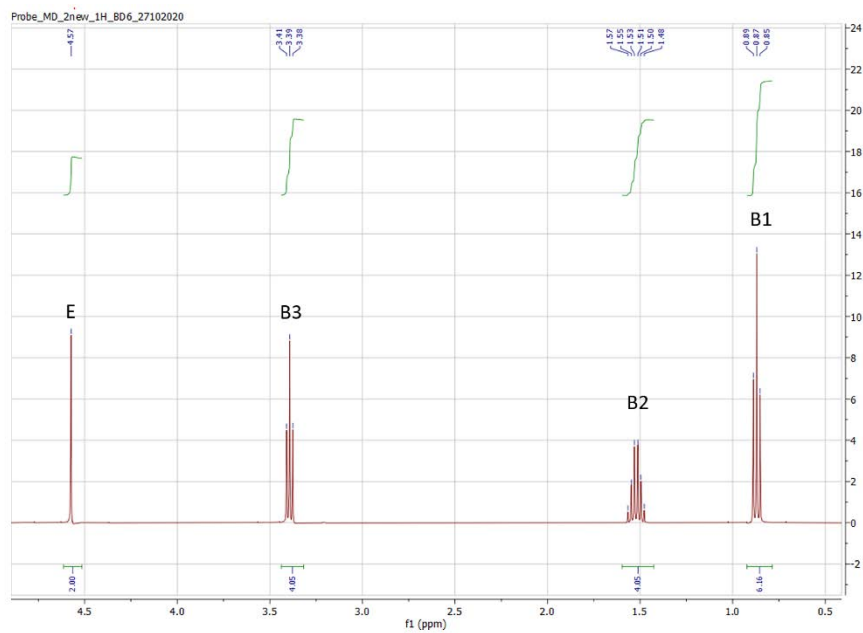

Figure B.2.2:  $^1\text{H}$ -NMR spectrum for DPM ( $\delta$  in ppm, J in Hz, in  $\text{C}_6\text{D}_6$ ): 4.57 (s, 2H, **E**); 3.39 (d, 4H, **B3**,  $^3\text{J}_{\text{H-H}} = 4$ ); 1.52 (m overlap, 4H, **B2**); 0.87 (pseudo t, overlap, 6H, **B1**,  $^3\text{J}_{\text{H-H}} = 8$ ).

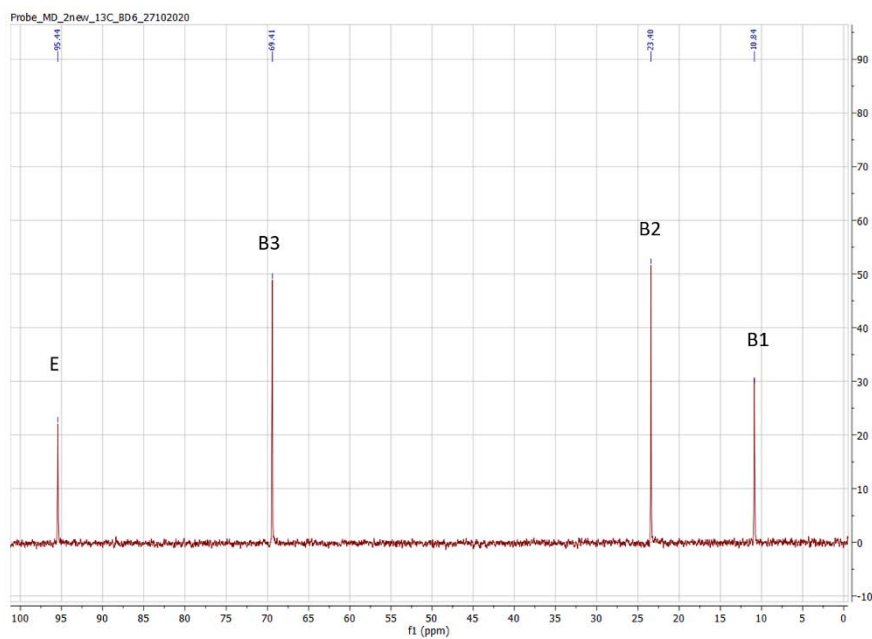

Figure B.2.3:  $^{13}\text{C}$ -NMR spectrum for DPM ( $\delta$  in ppm, J in Hz, in  $\text{C}_6\text{D}_6$ ): 95.49 ppm (**E**,  $^1\text{J}_{\text{C-H}} = 161.0$  Hz); 69.46 (**B3**,  $^1\text{J}_{\text{C-H}} = 135.0$  Hz); 23.43 (**B2**,  $^1\text{J}_{\text{C-H}} = 127.7$  Hz); 10.87 (**B1**,  $^1\text{J}_{\text{C-H}} = 125.4$  Hz).

### B.3 NMR spectra for DBM:

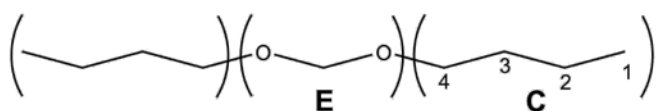

Figure B.3.1: Nomenclature for NMR analysis of DBM.

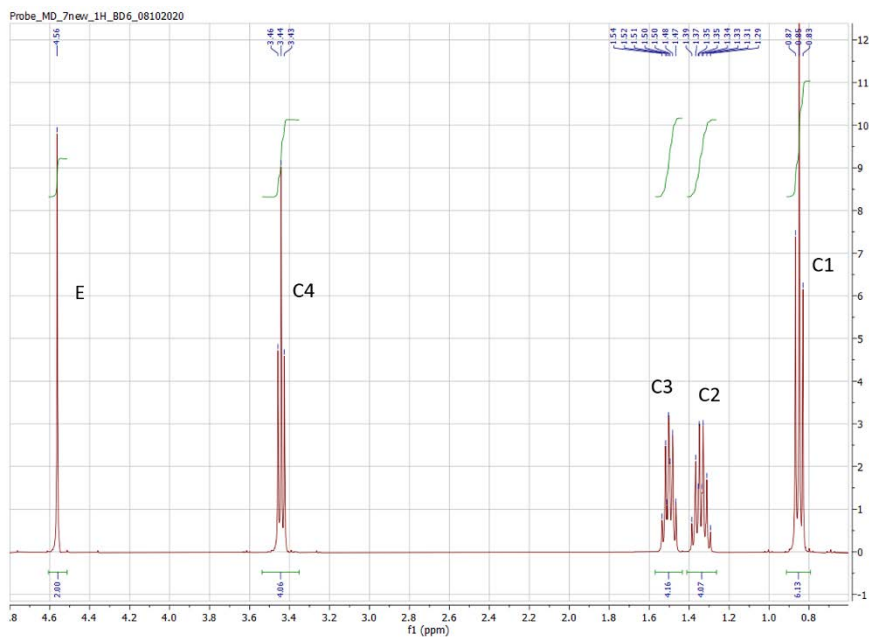

Figure B.3.2:  $^1H$ -NMR spectrum for DBM ( $\delta$  in ppm, J in Hz, in  $C_6D_6$ ): 4.57 (s, 2H, E); 3.45 (t, 4H, C4,  $^3J_{H-H}=8$  Hz); 1.51 (quint., 4H, C3); 1.32 (m, 4H, C2); 0.85 (t, 6H, C1,  $^3J_{H-H}=8$  Hz).

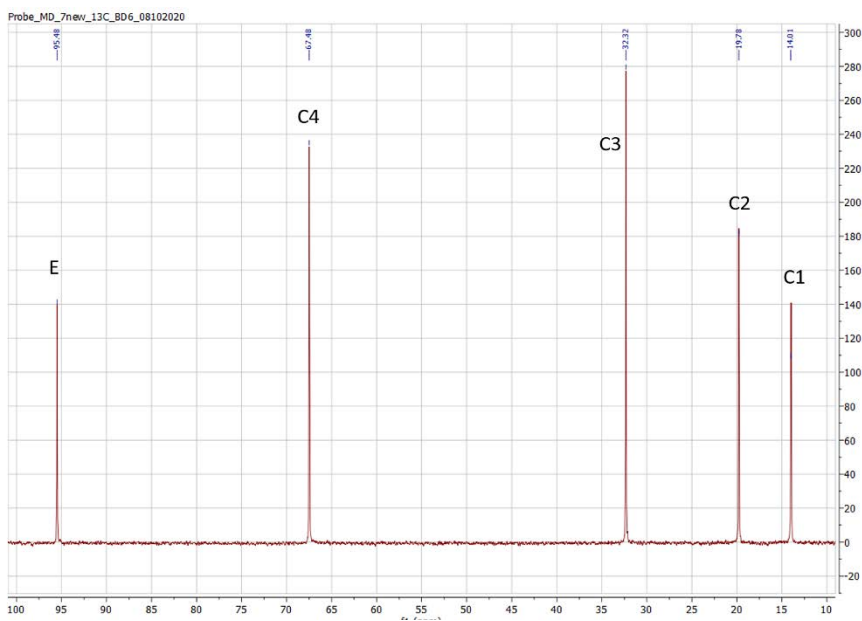

Figure B.3.3:  $^{13}C$ -NMR spectrum for DBM ( $\delta$  in ppm, J in Hz, in  $C_6D_6$ ): 95.50 ppm (E  $^1J_{C-H}=161.3$ ); 67.51 (C4  $^1J_{C-H}=141.2$ ); 32.34 (C3  $^1J_{C-H}=124.2$ ); 19.80 (C2  $^1J_{C-H}=124.2$ ); 14.00 (C1  $^1J_{C-H}=124.2$ ).

## B.4 NMR spectra for D(2-EH)M:

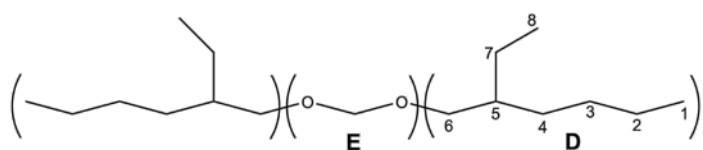

Figure B.4.1: Nomenclature for NMR analysis of D(2-EH)M.

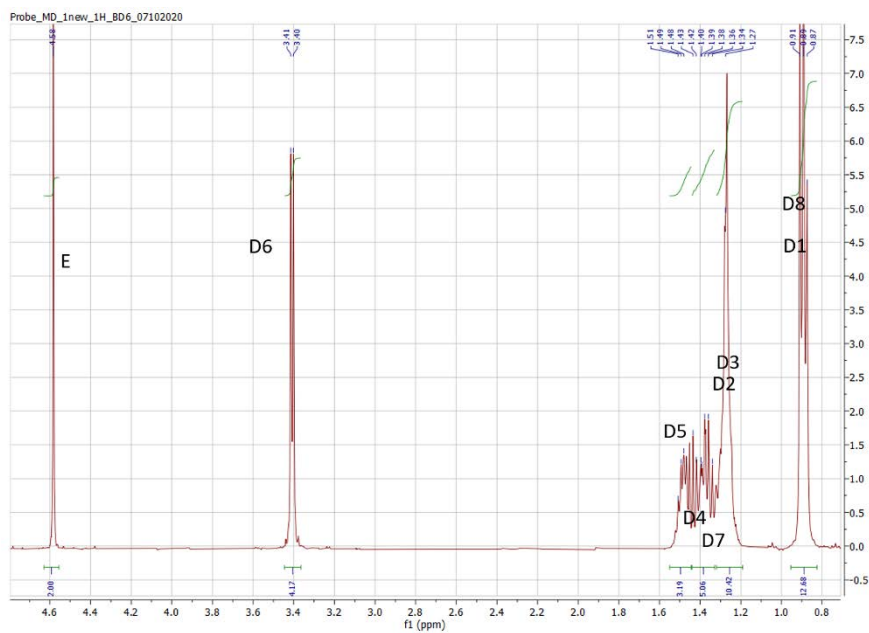

Figure B.4.2: <sup>1</sup>H-NMR spectrum for D(2-EH)M ( $\delta$  in ppm, J in Hz, in  $C_6D_6$ ): 4.50 (s, 2H, E) ; 3.40 (d, 2H, D6, <sup>3</sup>JH-H = 4 Hz) ; 1.50-1.34 (m overlap, 8H, D7, D5) ; 1.27 (m overlap, 12H, D2, D3, D4) ; 0.89 (pseudo t overlap, 12H, D1 & D8, <sup>3</sup>JH-H = 8 Hz).

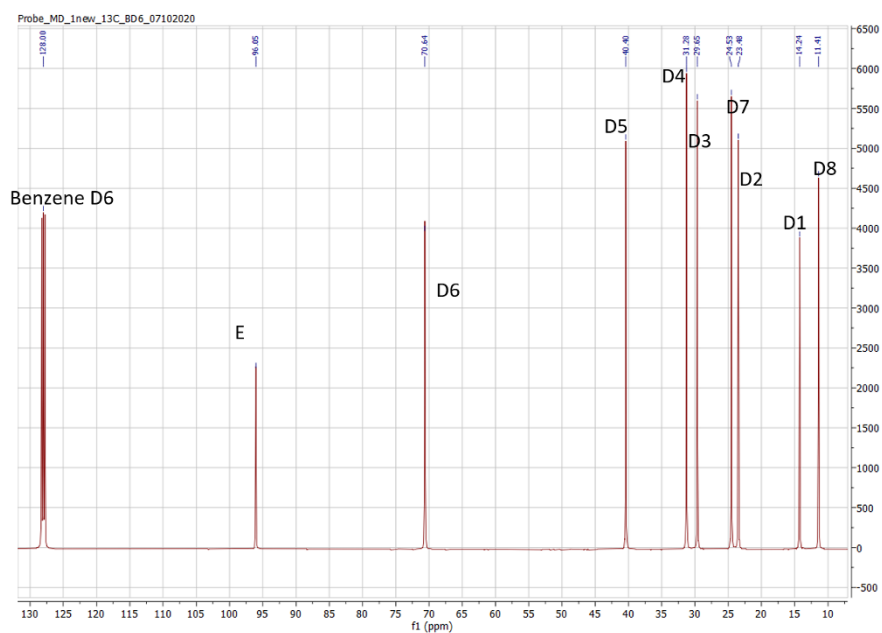

Figure B.4.3: <sup>13</sup>C-NMR spectrum for D(2-EH)M ( $\delta$  in ppm, J in Hz, in  $C_6D_6$ ): 96.05 ppm (E <sup>1</sup>JC-H= 160.9); 70.64 (D6 <sup>1</sup>JC-H= 139.8); 40.40 (D5 <sup>1</sup>JC-H= 126.6); 31.28 (D4 <sup>1</sup>JC-H= 127.8); 29.65 (D3 <sup>1</sup>JC-H= 126.9); 24.53 (D7, <sup>1</sup>JC-H= 126.4); 23.48 (D2, <sup>1</sup>JC-H= 124.5); 14.24 (D1, <sup>1</sup>JC-H= 124.3); 11.41 (D8, <sup>1</sup>JC-H= 124.6).

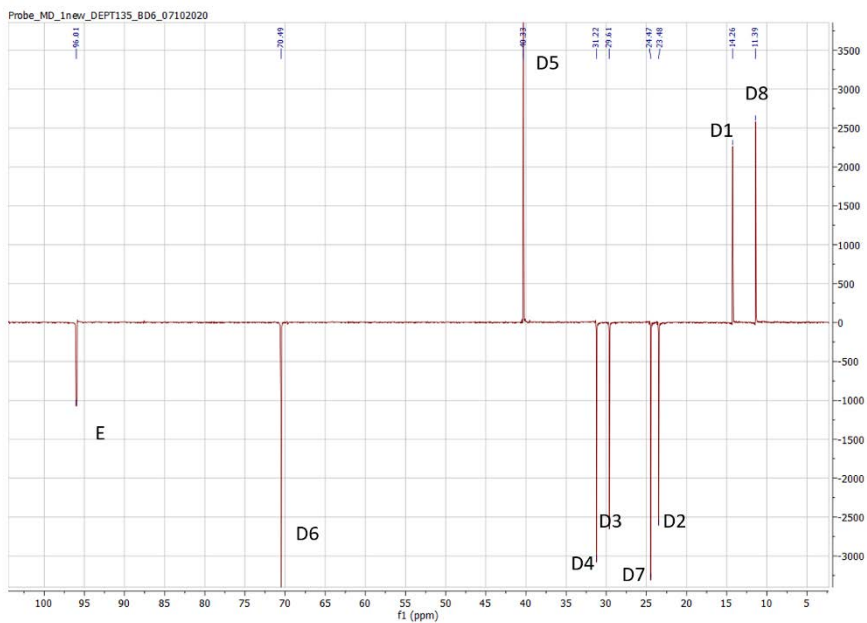

Figure B.4.4:  $^{13}\text{C}$  ; DEPT135 spectrum for D(2-EH)M:  $\delta$  (ppm, in  $\text{C}_6\text{D}_6$ ).

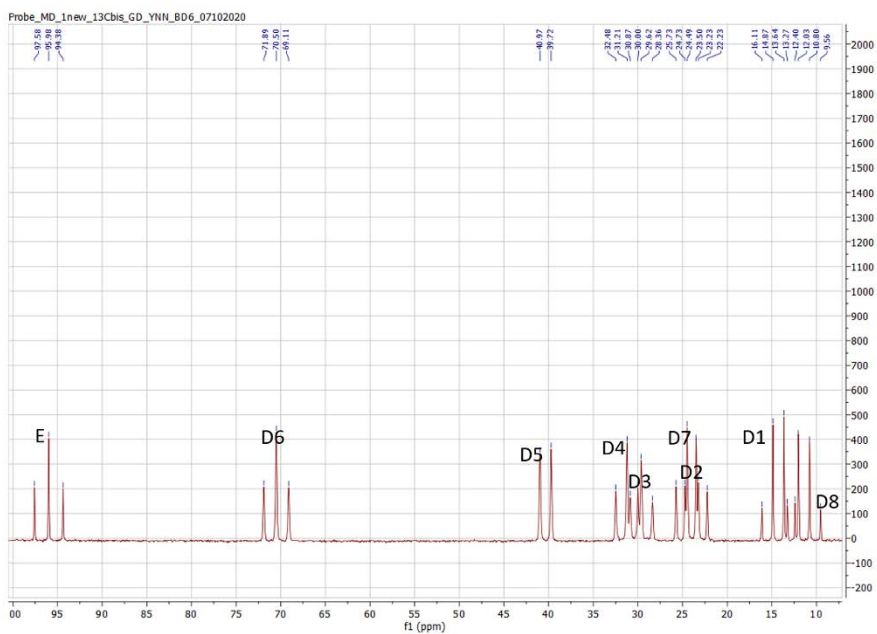

Figure B.4.5:  $^{13}\text{C}$  spectrum recorded with  $^1\text{H}$  coupling via Gated Decoupling measurement for D(2-EH)M:  $\delta$  (ppm, in  $\text{C}_6\text{D}_6$ ).

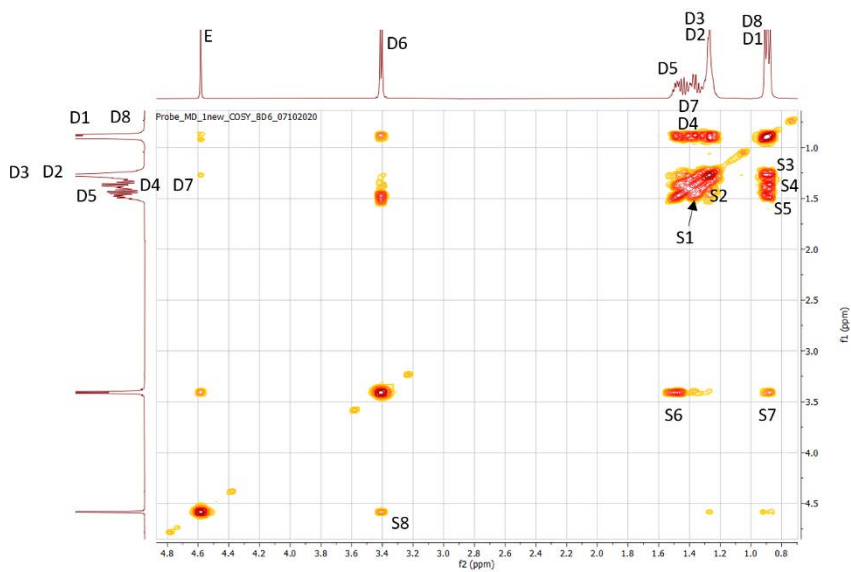

Figure B.4.6:  $^1\text{H}, ^1\text{H}$  COSY 2D spectrum for D(2-EH)M ( $\delta$  in ppm, in  $\text{C}_6\text{D}_6$ ).

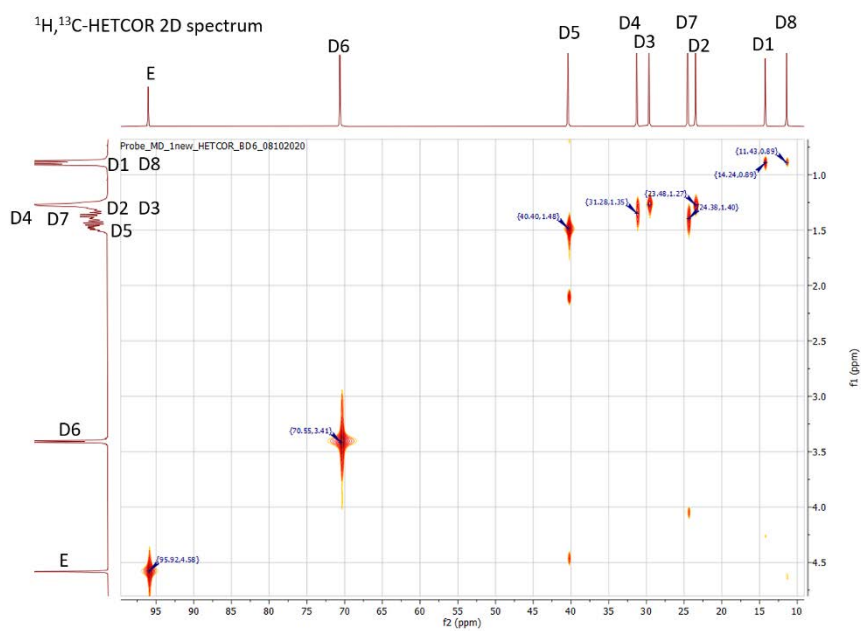

Figure B.4.7:  $^1\text{H}, ^{13}\text{C}$ -HETCOR 2D spectrum for D(2-EH)M ( $\delta$  in ppm, in  $\text{C}_6\text{D}_6$ ).



## B.5 NMR spectra for (2-EH)EM:

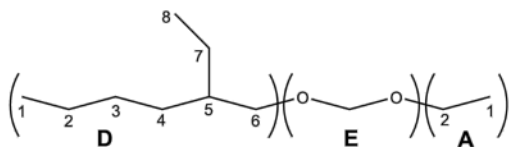

Figure B.5.1: Nomenclature for NMR analysis of (2-EH)EM.

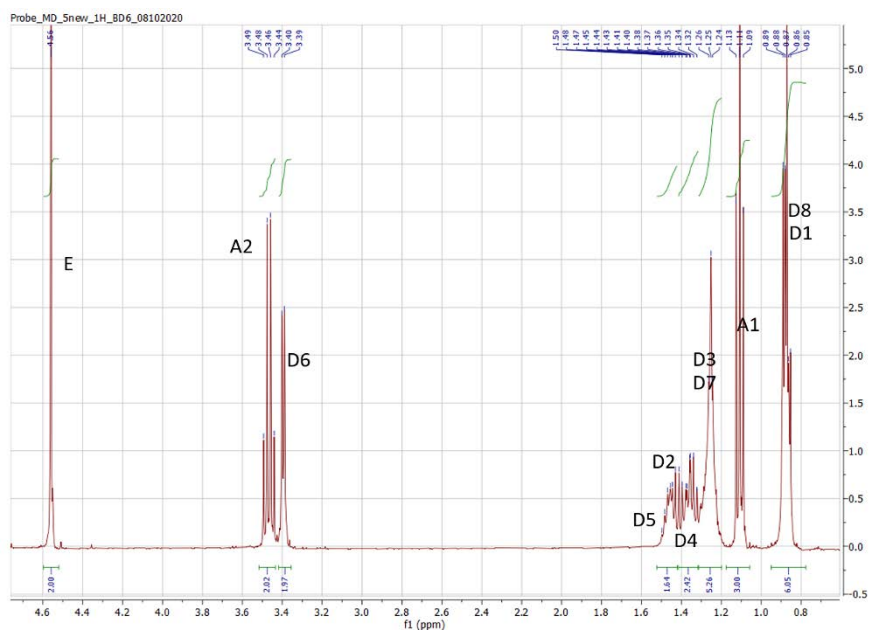

Figure B.5.2: <sup>1</sup>H-NMR spectrum for (2-EH)EM (δ in ppm, J in Hz, in C<sub>6</sub>D<sub>6</sub>, ref. @7.16ppm, J in Hz): 4.56 (s, 2H, E), 3.47 (q, 2H, A2, <sup>3</sup>J<sub>H,H</sub> 8.0), 3.40 (d, 2H, D6, <sup>3</sup>J<sub>H,H</sub> 8.0), 1.50-1.32 (m, 4H, D5, D2, D4), 1.25 (s, broad, 6H, D7, D3), 1.11 (t, 2H, A1, <sup>3</sup>J<sub>H,H</sub> 8.0); 0.87 (m as 2x t overlap, 9H, D1, D8).

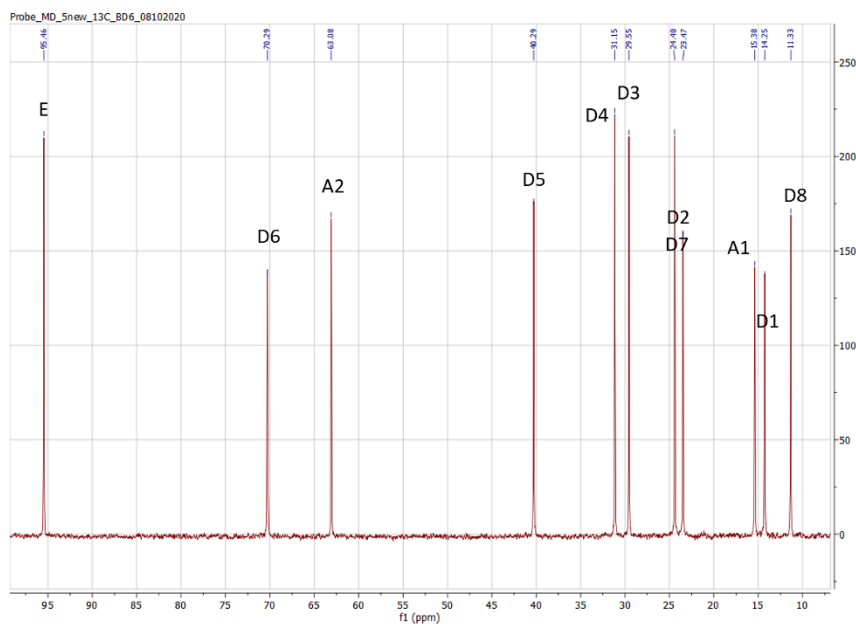

Figure B.5.3: <sup>13</sup>C-NMR spectrum for (2-EH)EM (δ in ppm, J in Hz, in C<sub>6</sub>D<sub>6</sub>): 95.46 ppm (E, <sup>1</sup>J<sub>C-H</sub>= 160.9), 70.29 (D6, <sup>1</sup>J<sub>C-H</sub>= 139.6), 63.08 (A2, <sup>1</sup>J<sub>C-H</sub>= 139.3), 40.29 (D5, <sup>1</sup>J<sub>C-H</sub>= 124.1), 31.15 (D4, <sup>1</sup>J<sub>C-H</sub>= 124.2), 29.55 (D3, <sup>1</sup>J<sub>C-H</sub>= 126.6), 24.40 (D2, <sup>1</sup>J<sub>C-H</sub>= 124.2), 23.48 (D7, <sup>1</sup>J<sub>C-H</sub>= 124.2), 15.38 (A1, <sup>1</sup>J<sub>C-H</sub>= 125.8), 14.25 (D1, <sup>1</sup>J<sub>C-H</sub>= 124.3), 11.33 (D8, <sup>1</sup>J<sub>C-H</sub>= 124.5).

## B.6 NMR spectra for (2-EH)PM:

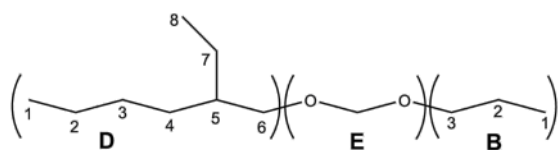

Figure B.6.1: Nomenclature for NMR analysis of (2-EH)PM.

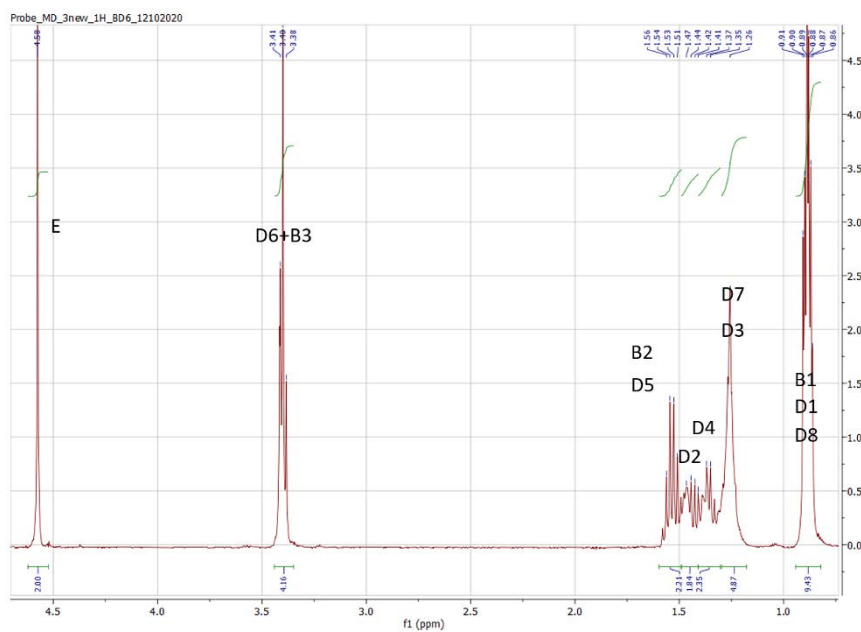

Figure B.6.2:  $^1\text{H}$ -NMR spectrum for (2-EH)PM ( $\delta$  in ppm, J in Hz, in  $\text{C}_6\text{D}_6$ ): 4.58 (s, 2H, E), 3.40 (t overlap, 4H, **D6**, **B3**  $^3\text{J}_{\text{H,H}}$  8.0 Hz), 1.56-1.33 (m overlap, 6H, **B2**, **D2**, **D4**, **D5**); 1.26 (m overlap, 5H, **D3**, **D7**); 0.88 (m, 9H, **B1**, **D1**, **D8**).

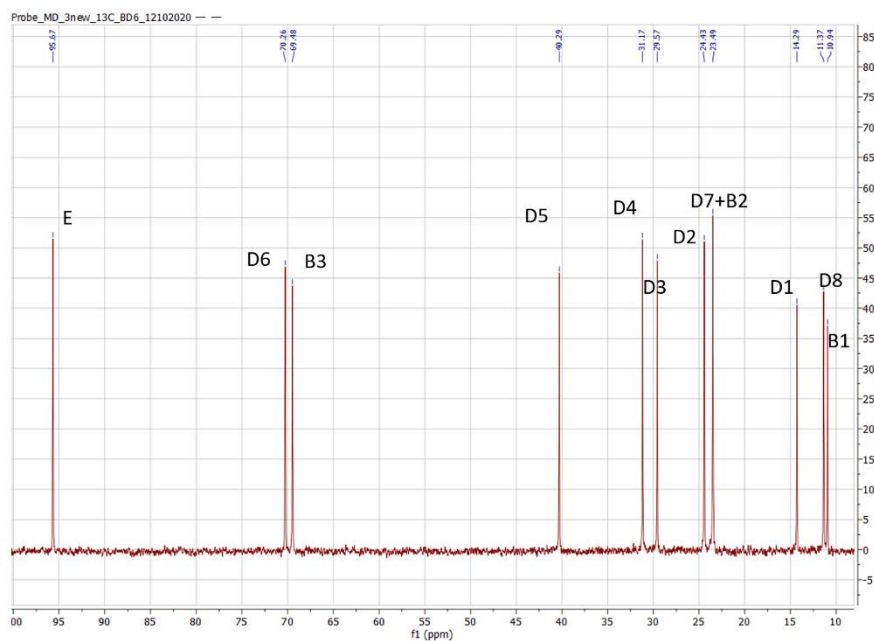

Figure B.6.3:  $^{13}\text{C}$ -NMR spectrum for (2-EH)PM ( $\delta$  in ppm, J in Hz, in  $\text{C}_6\text{D}_6$ ): 95.67 ppm (E,  $^1\text{J}_{\text{C-H}}=161.4$ ); 70.26 (**D6**,  $^1\text{J}_{\text{C-H}}=138.8$ ); 69.48 (**B3**,  $^1\text{J}_{\text{C-H}}=140.8$ ); 40.29 (**D5**,  $^1\text{J}_{\text{C-H}}=125.4$ ); 31.17 (**D4**,  $^1\text{J}_{\text{C-H}}=128.1$ ); 29.57 (**D3**,  $^1\text{J}_{\text{C-H}}=126.1$ ); 24.43 (**D2**,  $^1\text{J}_{\text{C-H}}=125.4$ ); 23.49 (**D7+B2**,  $^1\text{J}_{\text{C-H}}\sim 123.4$ ); 14.29 (**D1**,  $^1\text{J}_{\text{C-H}}=124.8$ ); 11.37 (**D8**,  $^1\text{J}_{\text{C-H}}=124.8$ ); 10.94 (**B1**,  $^1\text{J}_{\text{C-H}}=124.8$ ).

## B.7 NMR spectra for (2-EH)BM:

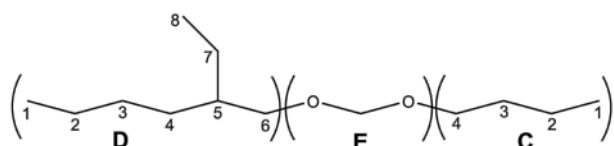

Figure B.7.1: Nomenclature for NMR analysis of (2-EH)BM.

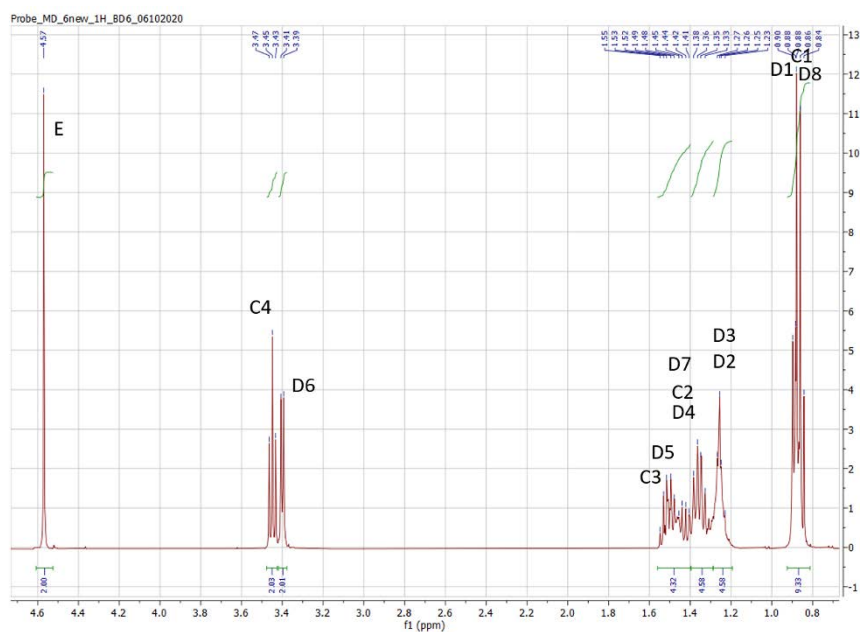

Figure B.7.2:  $^1\text{H}$ -NMR spectrum for (2-EH)BM ( $\delta$  in ppm, J in Hz, in  $\text{C}_6\text{D}_6$ ): 4.57 (s, 2H, E), 3.45 (t, 2H, C4,  $^3\text{J}_{\text{H,H}}$  8.0), 3.40 (d, 2H, D6,  $^3\text{J}_{\text{H,H}}$  8.0), 1.55-1.33 (m, 8H, C3, D5, D4, D7), 1.26 (s, broad, 4H, D3, D2), 0.81 (m as 2x t overlap, 9H, D1, C1, D8).

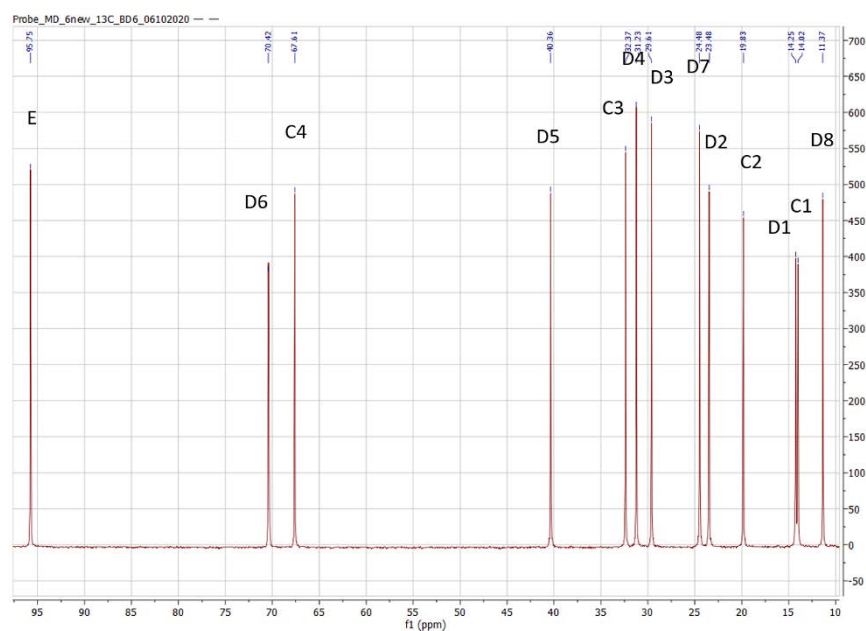

Figure B.7.3:  $^{13}\text{C}$ -NMR spectrum for (2-EH)BM ( $\delta$  in ppm, J in Hz, in  $\text{C}_6\text{D}_6$ ): 95.75 ppm (E,  $^1\text{J}_{\text{C-H}}$  = 161.2), 70.41 (D6,  $^1\text{J}_{\text{C-H}}$  = 139.8), 67.61 (C4,  $^1\text{J}_{\text{C-H}}$  = 140.4), 40.36 (D5,  $^1\text{J}_{\text{C-H}}$  = 126.3), 32.37 (C3,  $^1\text{J}_{\text{C-H}}$  = ~122), 31.23 (D4,  $^1\text{J}_{\text{C-H}}$  = 126.1), 29.61 (D3,  $^1\text{J}_{\text{C-H}}$  = 122.1), 24.48 (D7,  $^1\text{J}_{\text{C-H}}$  = 124.1), 23.48 (D2,  $^1\text{J}_{\text{C-H}}$  = 122.1), 19.83 (C2,  $^1\text{J}_{\text{C-H}}$  = 122.1), 14.25 (D1,  $^1\text{J}_{\text{C-H}}$  = 124.1), 14.02 (C1,  $^1\text{J}_{\text{C-H}}$  = 124.1), 11.37 (D8,  $^1\text{J}_{\text{C-H}}$  = 124.5).

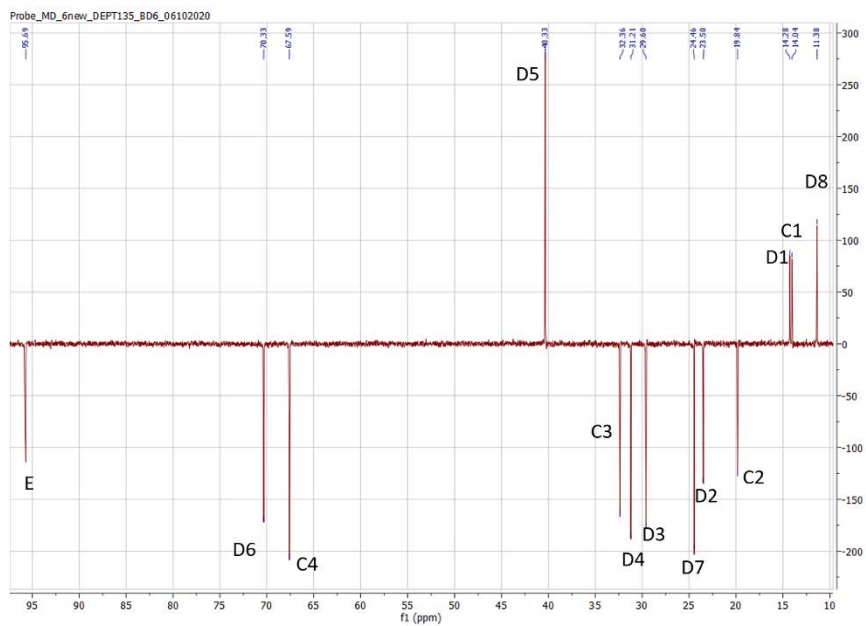

Figure B.7.4:  $^{13}\text{C}$  ; DEPT135 spectrum for (2-EH)BM:  $\delta$  (ppm, in  $\text{C}_6\text{D}_6$ ).

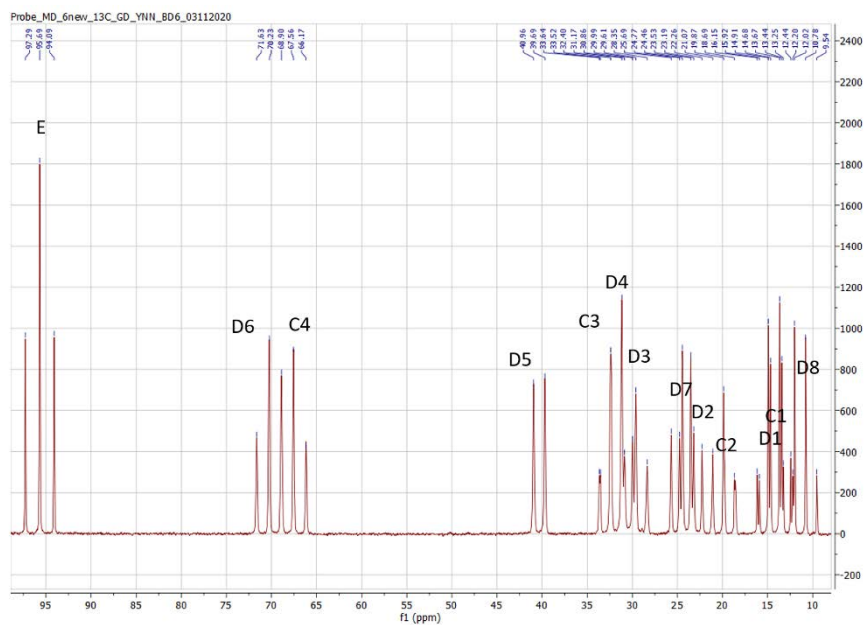

Figure B.7.5:  $^{13}\text{C}$  spectrum recorded with  $^1\text{H}$  coupling via Gated Decoupling measurement for (2-EH)BM ( $\delta$  in ppm, in  $\text{C}_6\text{D}_6$ ).

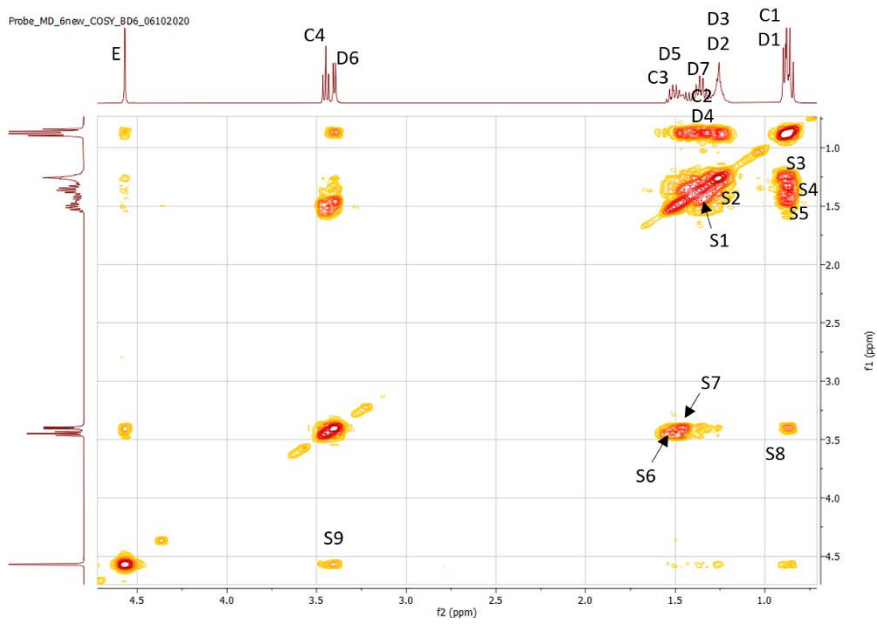

Figure B.7.6:  $^1\text{H}$ ,  $^1\text{H}$  COSY 2D spectrum for (2-EH)BM ( $\delta$  in ppm, in  $\text{C}_6\text{D}_6$ ).

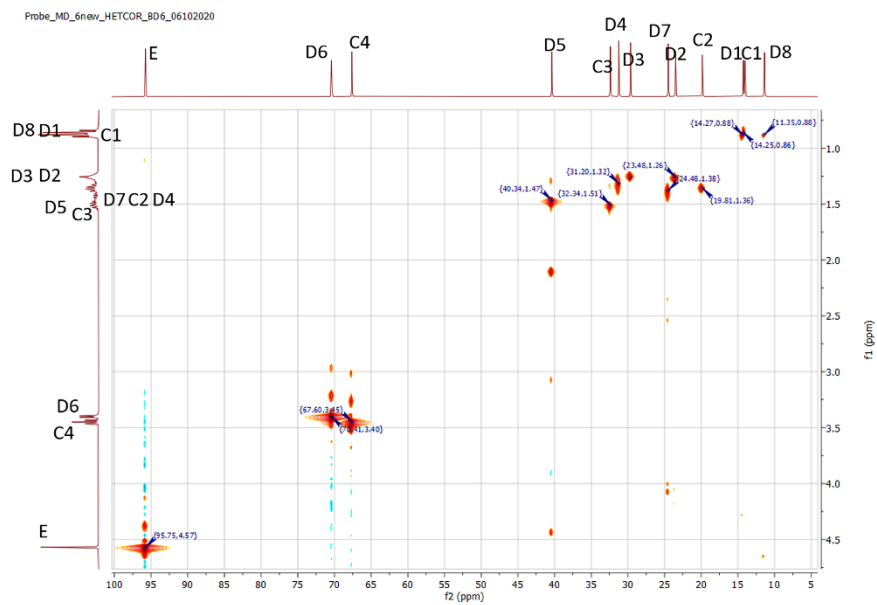

Figure B.7.7:  $^1\text{H}$ ,  $^{13}\text{C}$ -HETCOR 2D spectrum for (2-EH)BM ( $\delta$  in ppm, in  $\text{C}_6\text{D}_6$ ).

### C. FTIR spectra:

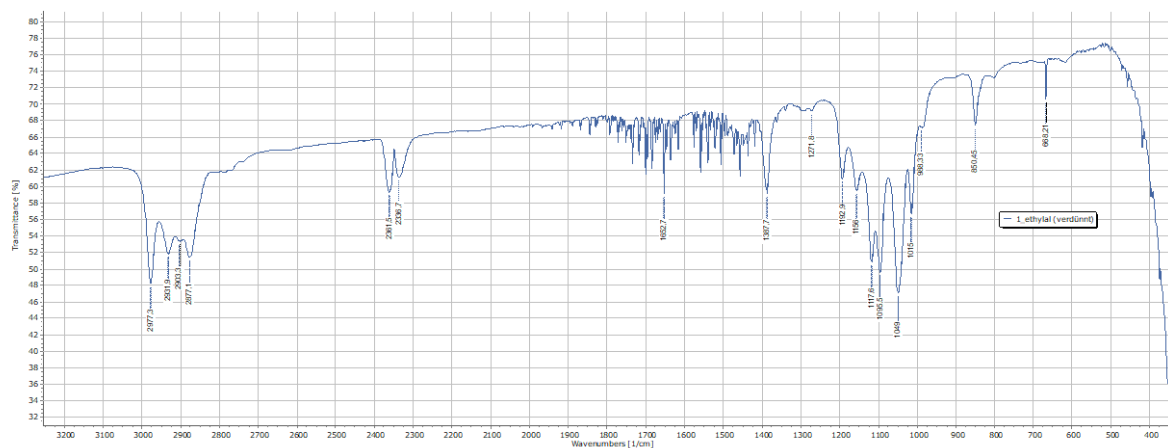

Figure C.1: FTIR spectrum of DEM.

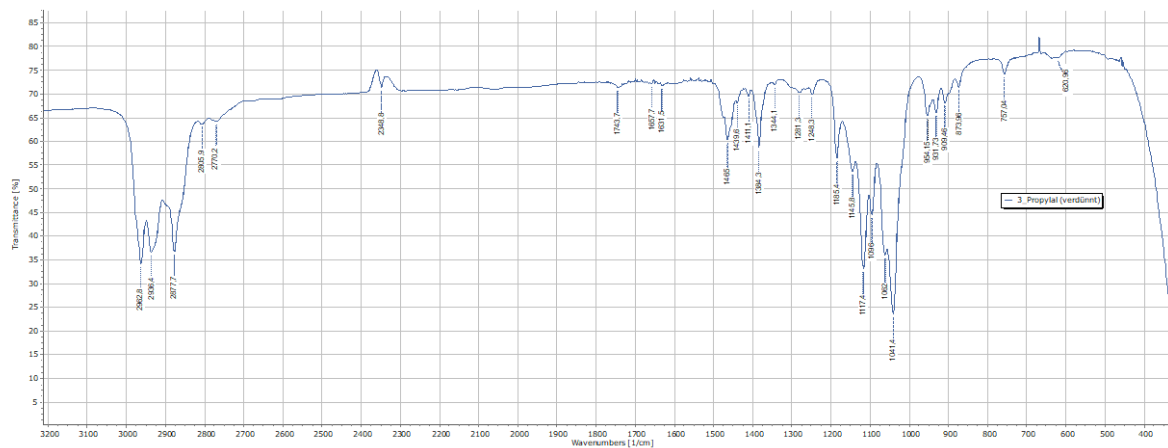

Figure C.2: FTIR spectrum of DPM.

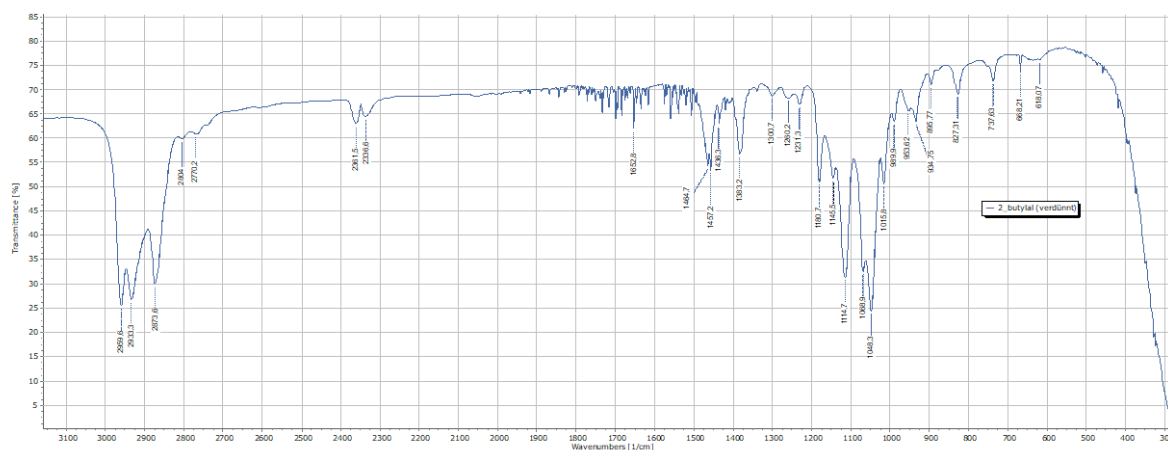

Figure C.3: FTIR spectrum of DBM.

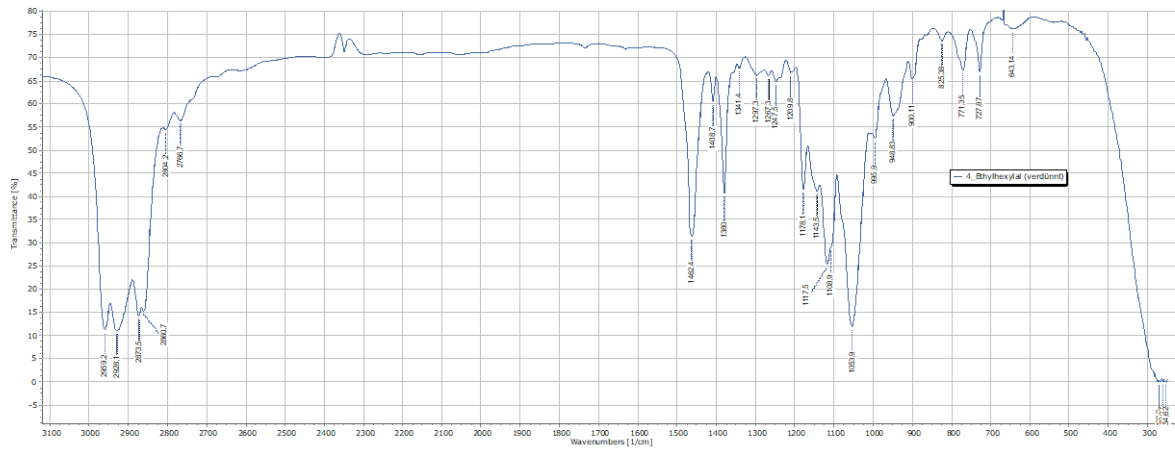

Figure C.4: FTIR spectrum of D(2-EH)M.

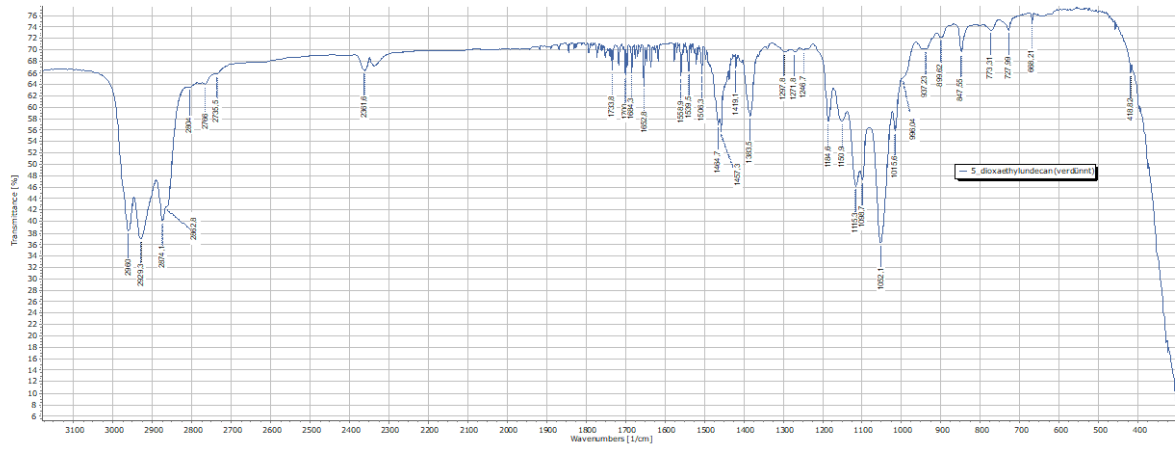

Figure C.5: FTIR spectrum of (2-EH)EM.

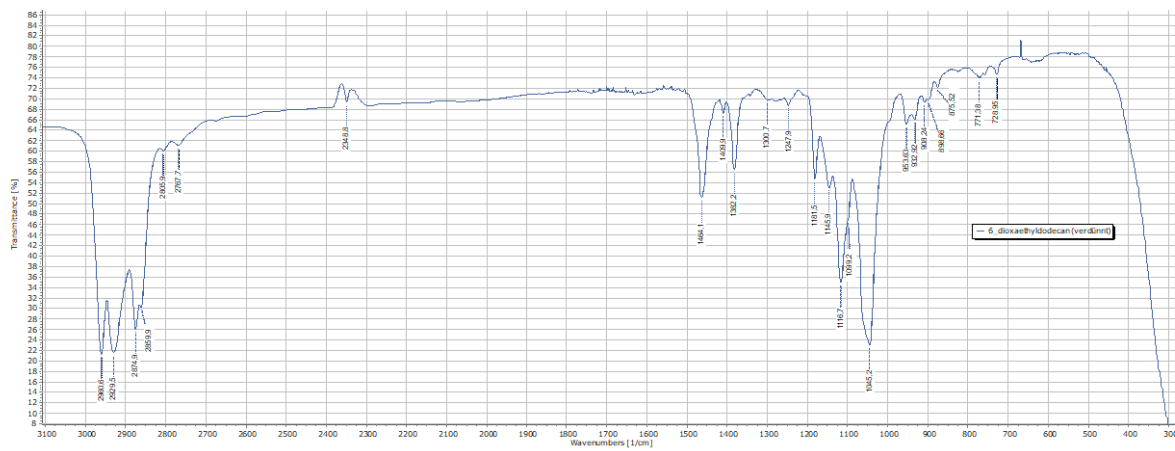

Figure C.6: FTIR spectrum of (2-EH)PM.

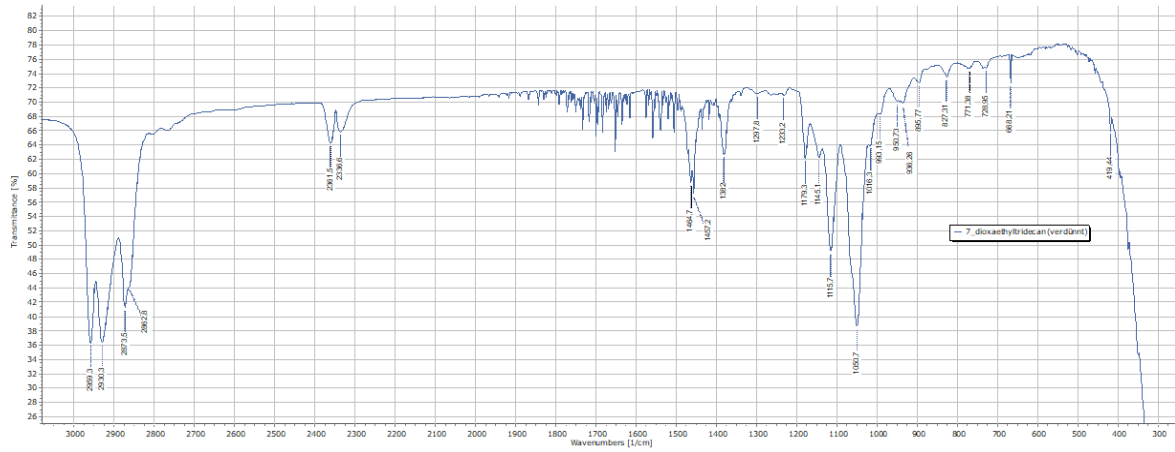

Figure C.7: FTIR spectrum of (2-EH)BM.

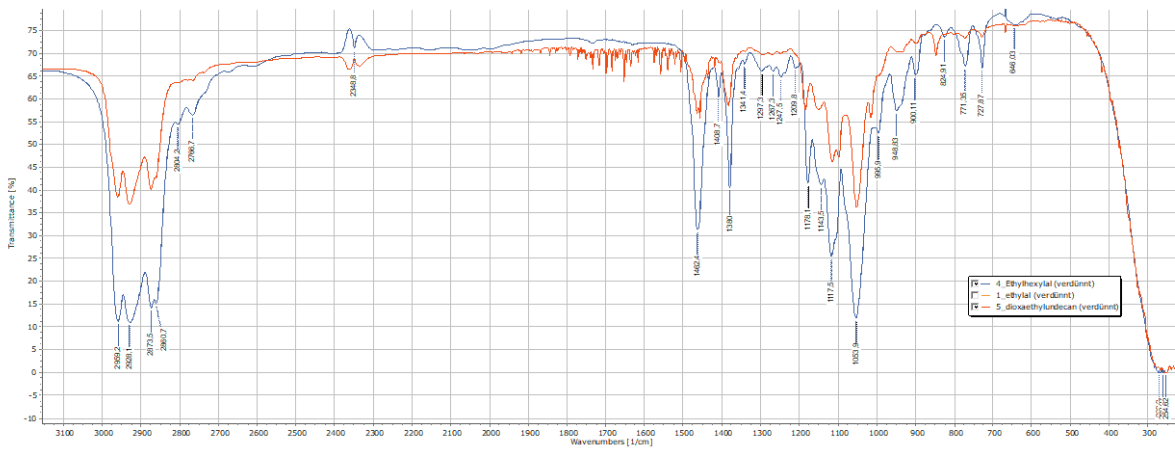

Figure C.8: Comparison of the FTIR spectra of D(2-EH)M and (2-EH)EM.

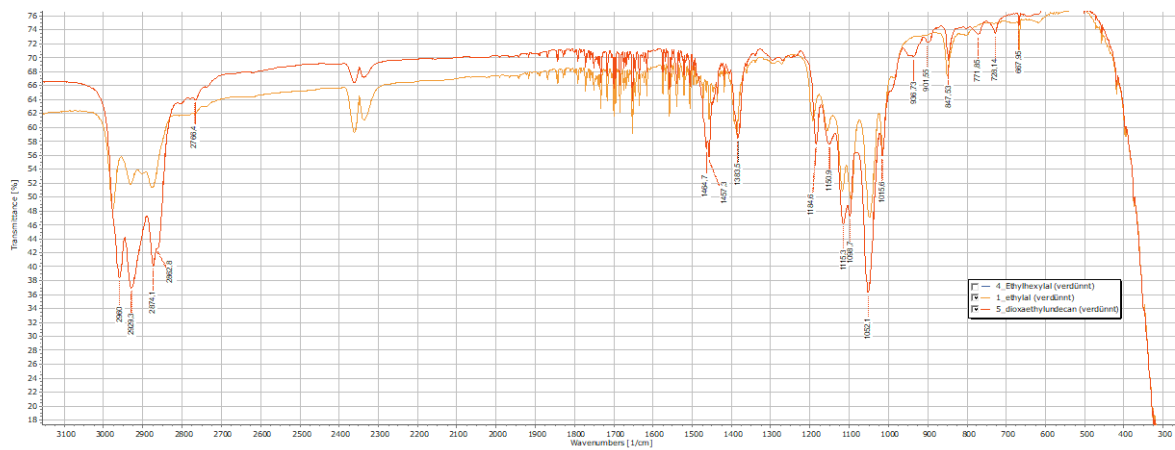

Figure C.9: Comparison of the FTIR spectra of DEM and (2-EH)EM.



## D. Mass spectra:

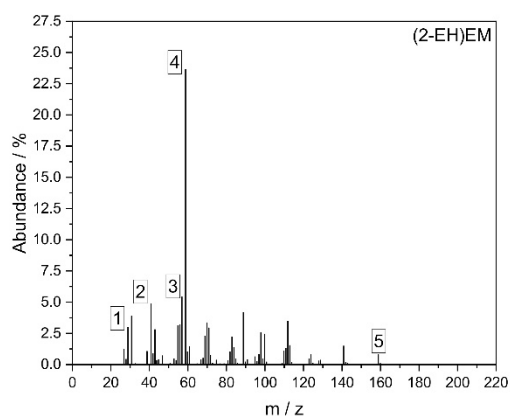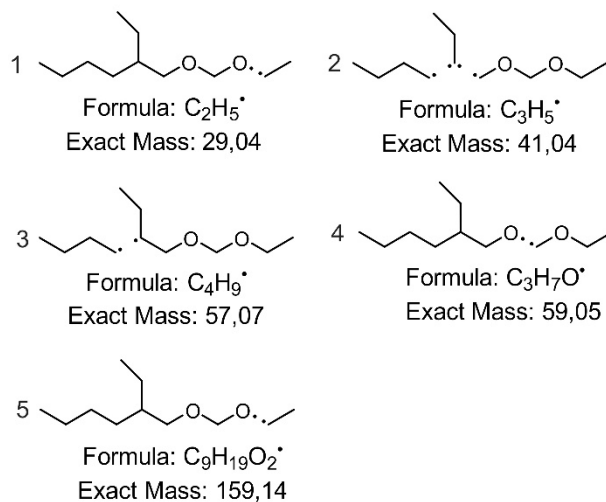

Figure D.1: Mass spectrum of (2-EH)EM and relevant fragments.

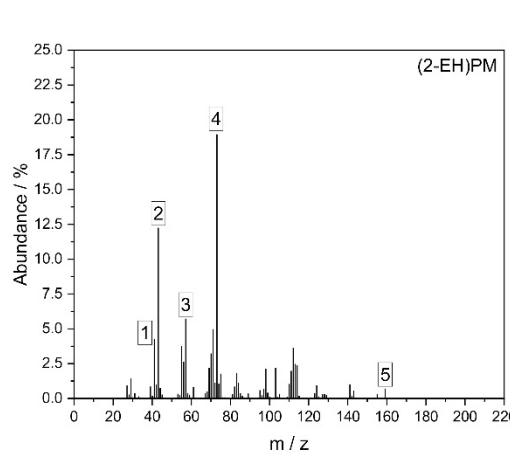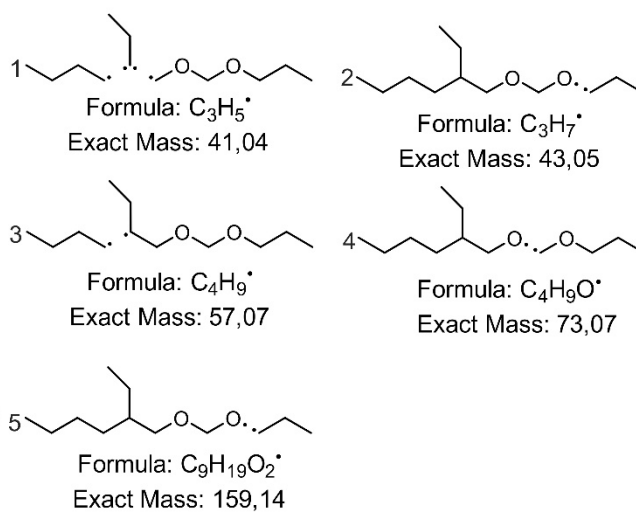

Figure D.2: Mass spectrum of (2-EH)PM and relevant fragments.

## E. Tables:

Table E.1: Molecular structure, CAS number, chemical formula, molar mass and oxygen content of OMDMEs and n-alkanes.

| Compound                  | Molecular structure                                                               | CAS No.    | Formula                                       | Molar mass<br>g/mol | Oxygen<br>content<br>wt% |
|---------------------------|-----------------------------------------------------------------------------------|------------|-----------------------------------------------|---------------------|--------------------------|
| DMM (OMDME <sub>1</sub> ) | 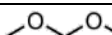 | 109-87-5   | C <sub>3</sub> H <sub>8</sub> O <sub>2</sub>  | 76.1                | 42.05                    |
| OMDME <sub>2</sub>        |  | 628-90-0   | C <sub>4</sub> H <sub>10</sub> O <sub>3</sub> | 106.1               | 45.24                    |
| OMDME <sub>3</sub>        |  | 13353-03-2 | C <sub>5</sub> H <sub>12</sub> O <sub>4</sub> | 136.2               | 46.99                    |
| OMDME <sub>4</sub>        |  | 13352-75-5 | C <sub>6</sub> H <sub>14</sub> O <sub>5</sub> | 166.2               | 48.13                    |
| OMDME <sub>5</sub>        |  | 13352-76-6 | C <sub>7</sub> H <sub>16</sub> O <sub>6</sub> | 196.2               | 48.93                    |
| OMDME <sub>6</sub>        |  | 13352-77-7 | C <sub>8</sub> H <sub>18</sub> O <sub>7</sub> | 226.2               | 49.51                    |
| n-heptane                 |  | 142-82-5   | C <sub>7</sub> H <sub>16</sub>                | 100.21              | 0.00                     |
| n-nonane                  |  | 111-84-2   | C <sub>9</sub> H <sub>20</sub>                | 128.26              | 0.00                     |
| n-undecane                |  | 1120-21-4  | C <sub>11</sub> H <sub>24</sub>               | 156.31              | 0.00                     |
| n-tridecane               |  | 629-50-5   | C <sub>13</sub> H <sub>28</sub>               | 184.37              | 0.00                     |
| n-tetradecane             |  | 629-59-4   | C <sub>14</sub> H <sub>30</sub>               | 198.39              | 0.00                     |
| n-pentadecane             |  | 629-62-9   | C <sub>15</sub> H <sub>32</sub>               | 212.42              | 0.00                     |
| n-nonadecane              |  | 629-92-5   | C <sub>19</sub> H <sub>40</sub>               | 268.53              | 0.00                     |

Table E.2: Physico-chemical properties of OMDMEs and n-alkanes.

| Compound                  | Density at 20 °C<br>kg/m <sup>3</sup> | Molar volume<br>cm <sup>3</sup> /mol | Melting point<br>°C | Boiling point<br>°C | Refractive index<br>- |
|---------------------------|---------------------------------------|--------------------------------------|---------------------|---------------------|-----------------------|
| DMM (OMDME <sub>1</sub> ) | 859.3 <sup>1</sup>                    | 88.6                                 | -105.0 <sup>1</sup> | 42.0 <sup>1</sup>   | 1.351 <sup>1</sup>    |
| OMDME <sub>2</sub>        | 971.0 <sup>2 a</sup>                  | 109.3                                | -69.7 <sup>3</sup>  | 105.0 <sup>3</sup>  | 1.384 <sup>4</sup>    |
| OMDME <sub>3</sub>        | 1030.5 <sup>4</sup>                   | 132.1                                | -42.5 <sup>3</sup>  | 155.9 <sup>3</sup>  | 1.396 <sup>4</sup>    |
| OMDME <sub>4</sub>        | 1073.7 <sup>4</sup>                   | 154.8                                | -9.8 <sup>3</sup>   | 201.8 <sup>3</sup>  | 1.406 <sup>4</sup>    |
| OMDME <sub>5</sub>        | 1105.7 <sup>4</sup>                   | 177.5                                | 18.3 <sup>3</sup>   | 242.3 <sup>3</sup>  | 1.413 <sup>4</sup>    |
| OMDME <sub>6</sub>        | 1140.0 <sup>5</sup>                   | 198.5                                | 38.0 <sup>5</sup>   | 273.0 <sup>5</sup>  | -                     |
| n-heptane                 | 683.7 <sup>6</sup>                    | 146.6                                | -90.6 <sup>6</sup>  | 98.4 <sup>6</sup>   | 1.386 <sup>1 a</sup>  |
| n-nonane                  | 719.2 <sup>1</sup>                    | 178.3                                | -53.5 <sup>6</sup>  | 150.8 <sup>6</sup>  | 1.406 <sup>1</sup>    |
| n-undecane                | 740.2 <sup>1</sup>                    | 211.2                                | -25.6 <sup>6</sup>  | 195.9 <sup>6</sup>  | 1.416 <sup>1</sup>    |
| n-tridecane               | 756.4 <sup>1</sup>                    | 243.7                                | -5.3 <sup>6</sup>   | 235.4 <sup>6</sup>  | 1.426 <sup>1</sup>    |
| n-tetradecane             | 759.6 <sup>1</sup>                    | 261.2                                | 6.0 <sup>6</sup>    | 253.5 <sup>6</sup>  | 1.429 <sup>1</sup>    |
| n-pentadecane             | 768.5 <sup>1</sup>                    | 276.4                                | 10.0 <sup>6</sup>   | 270.6 <sup>6</sup>  | 1.432 <sup>1</sup>    |
| n-nonadecane              | 785.5 <sup>1</sup>                    | 341.9                                | 32.0 <sup>6</sup>   | 330.1 <sup>6</sup>  | 1.441 <sup>1</sup>    |

<sup>a</sup> at 25 °C

Table E.3: Fuel properties of OMDMEs and n-alkanes.

| Compound                  | Cetane number       | Autoignition point<br>°C | Flash point<br>°C   | Kinematic viscosity at 20 °C<br>mm <sup>2</sup> /s | HFRR<br>µm         | CFPP<br>°C | Surface tension<br>mN/m |
|---------------------------|---------------------|--------------------------|---------------------|----------------------------------------------------|--------------------|------------|-------------------------|
| DMM (OMDME <sub>1</sub> ) | 28.0 <sup>7 a</sup> | 237 <sup>1</sup>         | -32 <sup>1</sup>    | 0.36 <sup>4 b</sup>                                | 759 <sup>8</sup>   | -          | 20.4 <sup>9</sup>       |
| OMDME <sub>2</sub>        | 68.0 <sup>7 a</sup> | 230 <sup>2</sup>         | 16 <sup>2</sup>     | 0.56 <sup>2 c</sup>                                | 545 <sup>2 b</sup> | -          | 27.0 <sup>2 b</sup>     |
| OMDME <sub>3</sub>        | 72.0 <sup>7 a</sup> | 235 <sup>4</sup>         | 54 <sup>4</sup>     | 1.08 <sup>4 b</sup>                                | 534 <sup>4</sup>   | -          | 28.8 <sup>4</sup>       |
| OMDME <sub>4</sub>        | 84.0 <sup>7 a</sup> | 235 <sup>4</sup>         | 88 <sup>4</sup>     | 1.72 <sup>4 b</sup>                                | 465 <sup>4</sup>   | -          | 30.7 <sup>4</sup>       |
| OMDME <sub>5</sub>        | 93.0 <sup>7 a</sup> | 240 <sup>4</sup>         | 115 <sup>4</sup>    | 2.63 <sup>4 b</sup>                                | 437 <sup>4</sup>   | -          | 32.6 <sup>4</sup>       |
| n-heptane                 | 56.0 <sup>10</sup>  | 204 <sup>10</sup>        | -7.4 <sup>11</sup>  | 0.61 <sup>6</sup>                                  | -                  | -          | 20.3 <sup>6</sup>       |
| n-nonane                  | 72.0 <sup>10</sup>  | 205 <sup>10</sup>        | 28.8 <sup>11</sup>  | 0.97 <sup>6</sup>                                  | -                  | -          | 22.9 <sup>6</sup>       |
| n-undecane                | 81.0 <sup>10</sup>  | 240 <sup>10</sup>        | 61.1 <sup>11</sup>  | 1.61 <sup>6</sup>                                  | -                  | -          | 24.7 <sup>6</sup>       |
| n-tridecane               | 90.0 <sup>10</sup>  | 202 <sup>10</sup>        | 90.6 <sup>11</sup>  | 2.47 <sup>6</sup>                                  | -                  | -          | 26.0 <sup>6</sup>       |
| n-tetradecane             | 95.0 <sup>10</sup>  | 220 <sup>10</sup>        | 104.5 <sup>11</sup> | 3.00 <sup>6</sup>                                  | -                  | -          | 26.6 <sup>6</sup>       |
| n-pentadecane             | 96.0 <sup>10</sup>  | 202 <sup>10</sup>        | 117.9 <sup>11</sup> | 3.58 <sup>6</sup>                                  | -                  | -          | 27.2 <sup>6</sup>       |
| n-nonadecane              | -                   | -                        | 167.4 <sup>11</sup> | -                                                  | -                  | -          | -                       |

<sup>a</sup> determined according to IP Standard 617

<sup>b</sup> at 25 °C

<sup>c</sup> at 40 °C

Table E.4: Thermodynamic properties of OMDMEs and n-alkanes.

| Compound                  | $\Delta H_f^0$<br>kJ/mol | $\Delta H_c^0$<br>kJ/mol | LHV<br>MJ/kg       | HHV<br>MJ/kg |
|---------------------------|--------------------------|--------------------------|--------------------|--------------|
| DMM (OMDME <sub>1</sub> ) | -443.33                  | 1880.52                  | 22.40 <sup>5</sup> | 24.71        |
| OMDME <sub>2</sub>        | -597.06                  | 2406.13                  | 20.60 <sup>5</sup> | 22.67        |
| OMDME <sub>3</sub>        | -777.59                  | 2904.94                  | 19.40 <sup>5</sup> | 21.33        |
| OMDME <sub>4</sub>        | -946.33                  | 3415.54                  | 18.70 <sup>5</sup> | 20.55        |
| OMDME <sub>5</sub>        | -1137.87                 | 3903.34                  | 18.10 <sup>5</sup> | 19.89        |
| OMDME <sub>6</sub>        | -1320.19                 | 4400.36                  | 17.70 <sup>5</sup> | 19.45        |
| n-heptane                 | -223.98 <sup>12</sup>    | 4816.92 <sup>12</sup>    | 44.56              | 48.07        |
| n-nonane                  | -274.97 <sup>12</sup>    | 6124.53 <sup>12</sup>    | 44.32              | 47.75        |
| n-undecane                | -325.96 <sup>12</sup>    | 7432.14 <sup>12</sup>    | 44.17              | 47.55        |
| n-tridecane               | -376.96 <sup>12</sup>    | 8739.74 <sup>12</sup>    | 44.06              | 47.40        |
| n-tetradecane             | -402.45 <sup>12</sup>    | 9393.55 <sup>12</sup>    | 44.02              | 47.35        |
| n-pentadecane             | -427.95 <sup>12</sup>    | 10047.35 <sup>12</sup>   | 43.99              | 47.30        |
| n-nonadecane              | -529.93 <sup>12</sup>    | 12662.57 <sup>12</sup>   | 43.88              | 47.16        |

Table E.5: Joback groups for the description of the investigated OMDAEs (all employed groups exhibit a non-ring structure).

| Compound | Joback group     |                    |      |     |
|----------|------------------|--------------------|------|-----|
|          | -CH <sub>3</sub> | -CH <sub>2</sub> - | >CH- | -O- |
| DEM      | 2                | 3                  | 0    | 2   |
| DPM      | 2                | 5                  | 0    | 2   |
| DBM      | 2                | 7                  | 0    | 2   |
| D(2-EH)M | 4                | 11                 | 2    | 2   |
| (2-EH)EM | 3                | 7                  | 1    | 2   |
| (2-EH)PM | 3                | 8                  | 1    | 2   |
| (2-EH)BM | 3                | 9                  | 1    | 2   |
| DMM      | 2                | 1                  | 0    | 2   |
| DPeM     | 2                | 9                  | 0    | 2   |
| DiBM     | 6                | 1                  | 2    | 2   |

Table E.6: Joback parameters for the estimation of boiling points ( $T_b$ ), melting points ( $T_m$ ), dynamic viscosities ( $\eta_a$  and  $\eta_b$ ) and enthalpies of fusion  $\Delta H_f^0$  of the investigated OMDAEs<sup>13</sup> (all employed groups exhibit a non-ring structure).

| Estimation parameters | Joback group     |                    |         |        |
|-----------------------|------------------|--------------------|---------|--------|
|                       | -CH <sub>3</sub> | -CH <sub>2</sub> - | >CH-    | -O-    |
| $T_b$                 | 23.58            | 22.88              | 21.74   | 22.42  |
| $T_m$                 | -5.1             | 11.27              | 12.64   | 22.23  |
| $\eta_a$              | 548.29           | 94.16              | -322.15 | 122.09 |
| $\eta_b$              | -1.719           | -0.199             | 1.187   | -0.386 |
| $\Delta H_f^0$        | -76.45           | -20.64             | 29.89   | -132.2 |

Table E.7: Data set used for fitting the regression function coefficients (part 1).

| Component | Density at 20 °C<br>kg/m <sup>3</sup> | Molar volume<br>cm <sup>3</sup> /mol | Boiling point<br>°C | Refractive index    |
|-----------|---------------------------------------|--------------------------------------|---------------------|---------------------|
|           |                                       |                                      |                     | -                   |
| DMM       | -                                     | 88.6                                 | 42.0 <sup>1</sup>   | 1.351 <sup>1</sup>  |
| DEM       | 829.7                                 | 125.5                                | 87.1                | 1.373               |
| DPM       | 834.6                                 | 158.4                                | 135.2               | 1.393               |
| DBM       | 835.4                                 | 191.8                                | 178.8               | 1.406               |
| DPeM      | 841.1 <sup>14</sup>                   | -                                    | 221.6 <sup>15</sup> | 1.417 <sup>14</sup> |
| D(2-EH)M  | 848.2                                 | 321.2                                | 285.1               | 1.435               |

Table E.8: Data set used for fitting the regression function coefficients (part 2).

| Component | Molar mass<br>g/mol | Flash point<br>°C  | Kinematic viscosity<br>at 20 °C<br>mm <sup>2</sup> /s | Surface tension<br>mN/m | $\Delta H_f^0$<br>kJ/mol | $\Delta H_c^0$<br>kJ/mol | LHV<br>MJ/kg       | HHV<br>MJ/kg |
|-----------|---------------------|--------------------|-------------------------------------------------------|-------------------------|--------------------------|--------------------------|--------------------|--------------|
| DMM       | 76.1                | -32.0 <sup>1</sup> | 0.36 <sup>4</sup>                                     | 20.4 <sup>9</sup>       | -443.33                  | 1880.52                  | 22.40 <sup>5</sup> | 24.71        |
| DEM       | 104.15              | -5.0               | 0.52                                                  | 21                      | -566.67                  | 3115.86                  | 27.38              | 29.92        |
| DPM       | 132.20              | 29.5               | 0.85                                                  | 23.1                    | -543.37                  | 4497.84                  | 31.36              | 34.02        |
| DBM       | 160.26              | 60.5               | 1.22                                                  | 24.3                    | -549.60                  | 5850.29                  | 33.76              | 36.51        |
| DPeM      | 188.31              | -                  | -                                                     | -                       | -                        | -                        | -                  | -            |
| D(2-EH)M  | 272.47              | 133.5              | 4.56                                                  | 27.1                    | -750.26                  | 11084.35                 | 37.78              | 40.68        |

## References

- 1 D. R. Lide, ed., *CRC handbook of chemistry and physics. A ready-reference book of chemical and physical data*, CRC Press, Boca Raton, 85th edn., 2004.
- 2 D. Deutsch, D. Oestreich, L. Lautenschütz, P. Haltenort, U. Arnold and J. Sauer, High Purity Oligomeric Oxymethylene Ethers as Diesel Fuels, *Chemie Ingenieur Technik*, 2017, **89**, 486–489.
- 3 R. H. Boyd, Some physical properties of polyoxymethylene dimethyl ethers, *Journal of Polymer Science*, 1961, **50**, 133–141.
- 4 L. Lautenschütz, D. Oestreich, P. Seidenspinner, U. Arnold, E. Dinjus and J. Sauer, Physico-chemical properties and fuel characteristics of oxymethylene dialkyl ethers, *Fuel*, 2016, **173**, 129–137.
- 5 E. Jacob, M. Stark, M. Härtl and G. Wachtmeister, in *11. Tagung Einspritzung und Kraftstoffe 2018*, ed. H. Tschöke and R. Marohn, Springer Vieweg, Wiesbaden, 2019, pp. 17–55.
- 6 Verein Deutscher Ingenieure, *VDI-Wärmeatlas*, Springer, 2013.
- 7 L. Lautenschütz, D. Oestreich, P. Seidenspinner, U. Arnold, E. Dinjus and J. Sauer, Corrigendum to “Physico-chemical properties and fuel characteristics of oxymethylene dialkyl ethers” [Fuel 173 (2016) 129–137], *Fuel*, 2017, **209**, 812.
- 8 M. Härtl, P. Seidenspinner, G. Wachtmeister and E. Jacob, Synthetischer Dieselkraftstoff OME1 — Lösungsansatz für den Zielkonflikt NO<sub>x</sub>-/Partikel-Emission, *MTZ - Motortechnische Zeitschrift*, 2014, **75**, 68–73.
- 9 X. Wang, J. Pan, J. Wu and Z. Liu, Surface Tension of Dimethoxymethane and Methyl tert-Butyl Ether, *Journal of Chemical & Engineering Data*, 2006, **51**, 1394–1397.
- 10 F. Harnisch, I. Blei, T. R. dos Santos, M. Möller, P. Nilges, P. Eilts and U. Schröder, From the test-tube to the test-engine, *RSC Advances*, 2013, **3**, 9594–9605.
- 11 W. A. Affens, Flammability Properties of Hydrocarbon Fuels. Interrelations of Flammability Properties of n-Alkanes in Air, *J. Chem. Eng. Data*, 1966, **11**, 197–202.
- 12 E. J. Prosen and F. D. Rossini, Heats of combustion and formation of the paraffin hydrocarbons at 25 degrees C, *J. RES. NATL. BUR. STAN.*, 1945, **34**, 263.
- 13 K. G. Joback and R. C. Reid, Estimation of pure-component properties from group-contributions, *Chemical Engineering Communications*, 1987, **57**, 233–243.
- 14 D. Kursanov, n-Butyl n-octyl formal, *Akad. Nauk S.S.S.R., Inst. Org. Khim. Sintezy Org. Soedinenii Sbornik*, **1950**.
- 15 M. Ghysels, Contribution à l'étude des formals des alcools primaires, *Bulletin des Societes Chimiques Belges*, 1924, **33**, 57–78.
